# Supplementary material
Source: PubMed Central journal article supplement (PMC1544149)

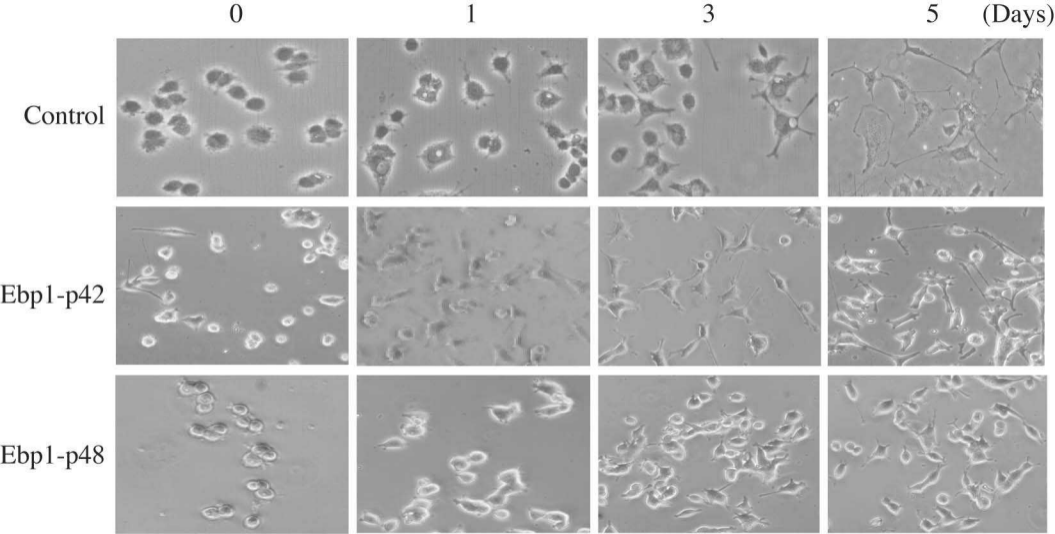

Supplement: pnas_0602923103_1.pdf [file pnas_0602923103_1.pdf]

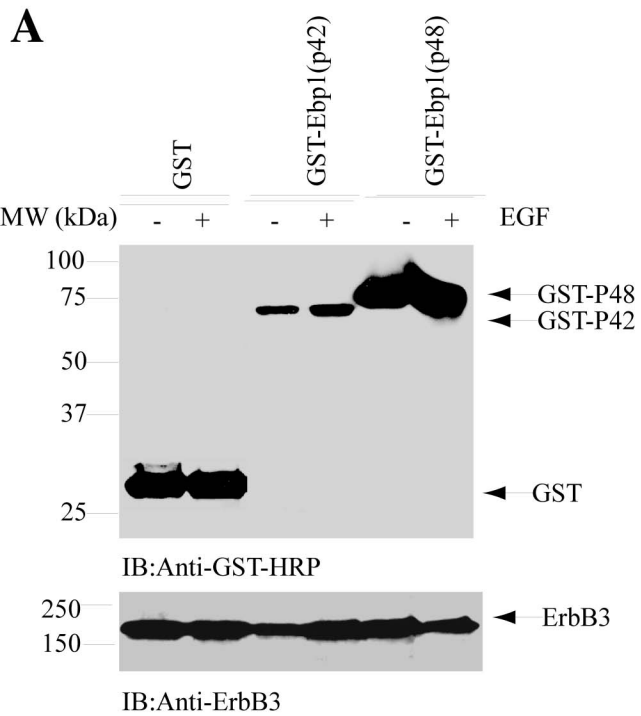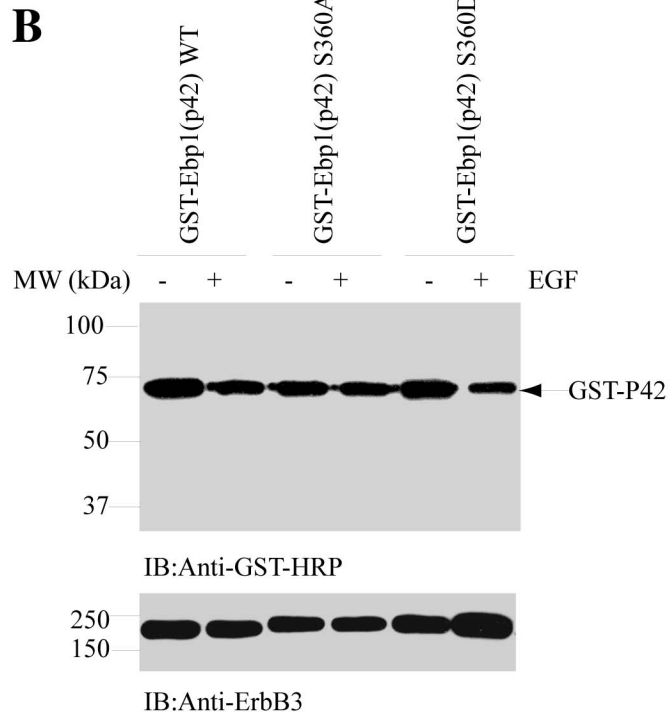

Supplement: pnas_0602923103_2.pdf [file pnas_0602923103_2.pdf]
